# Supplementary material
Source: MDPI journal article supplement (https://www.mdpi.com/2227-9040/9/11/313)
Supplement: s1 [file s1]

# Laser Illumination Adjustments for Signal-to-Noise Ratio and Spatial Resolution Enhancement in Static 2D Chemical Images of NbO<sub>x</sub>/IGZO/ITO/Glass Light-Addressable Potentiometric Sensors

Chun-Hui Chen <sup>1</sup>, Neelanjan Akuli <sup>2</sup>, Yu-Jen Lu <sup>3,4</sup> and Chia-Ming Yang <sup>1,3,5,6,7,8,\*</sup>

Department of Electronic Engineering, Chang-Gung University, Taoyuan 33302, Taiwan; jyunhuei791211@gmail.com

<sup>2</sup> Mechanical Engineering Department, Indian Institute of Technology Kharagpur, Kharagpur 721302, India; akneelanjan@gmail.com

<sup>3</sup> Department of Neurosurgery, Chang Gung Memorial Hospital, Linkou, Taoyuan 33305, Taiwan; alexlu0416@gmail.com

<sup>4</sup> The College of Medicine, Chang Gung University, Taoyuan 33302, Taiwan

<sup>5</sup> Institute of Electro-Optical Engineering, Chang Gung University, Taoyuan 33302, Taiwan

<sup>6</sup> Biosensor Group, Biomedical Engineering Research Center, Chang Gung University, Taoyuan 33302, Taiwan

<sup>7</sup> Department of General Surgery, Chang Gung Memorial Hospital, Linkou, Taoyuan 33305, Taiwan

<sup>8</sup> Artificial Intelligence Research Center, Chang-Gung University, Taoyuan 33302, Taiwan

\* Correspondence: cmyang@mail.cgu.edu.tw

† Chun-Hui Chen, Neelanjan Akuli, and Yu-Jen Lu contributed equally to this work.

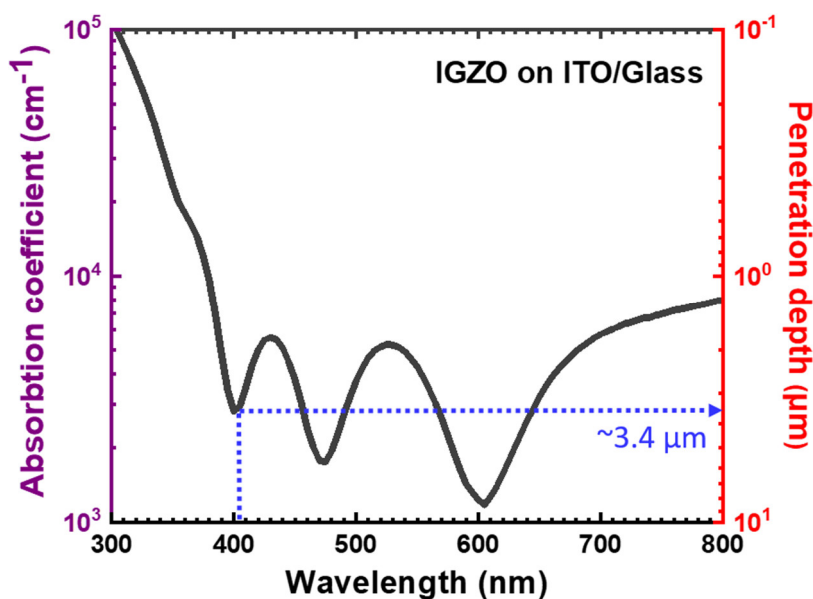

**Figure S1.** Optical absorption spectrum of this fabricated IGZO/ITO/glass sample. Calculated penetration depth is approximately 3.4 μm.

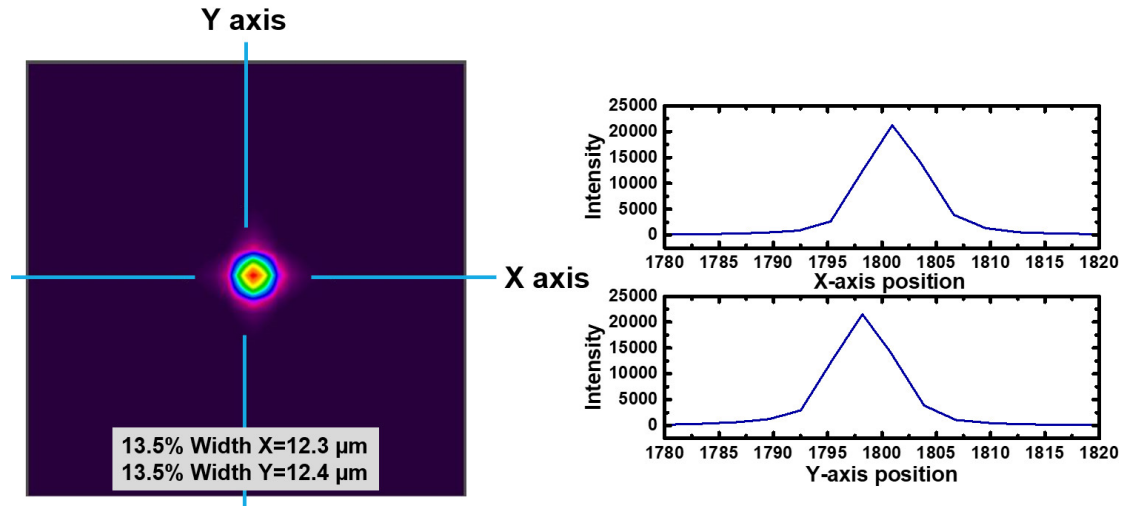

**Figure S2.** The dimensions of the 405 nm laser spot were controlled by the lens and focused to a minimum size of  $12.3 \times 12.4 \mu\text{m}$ , which was collected by a commercial beam profiler (NanoScan 2 s, Ophir Photonics, U.S.).

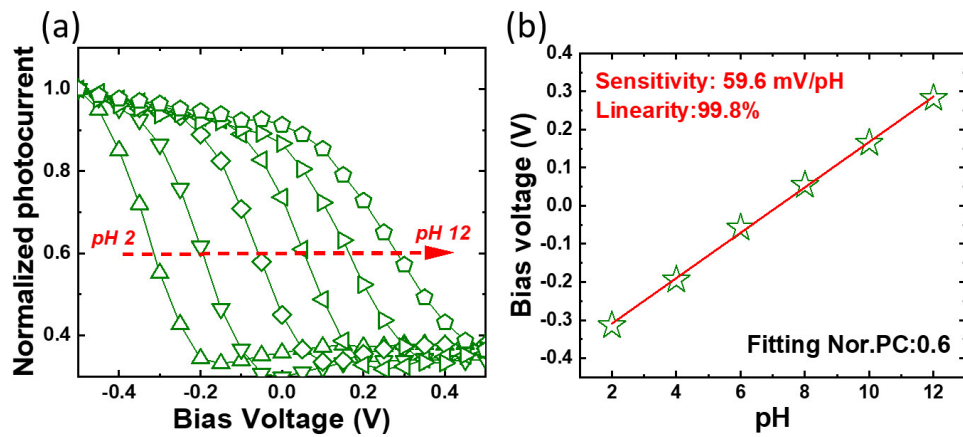

**Figure S3.** (a) Photocurrent versus bias voltage (PC-V) curves measured in various pH buffer solutions and (b) the calculated pH sensitivity and linearity by using the output voltage at the 60% of normalized photocurrent of this fabricated IGZO LAPS sample.

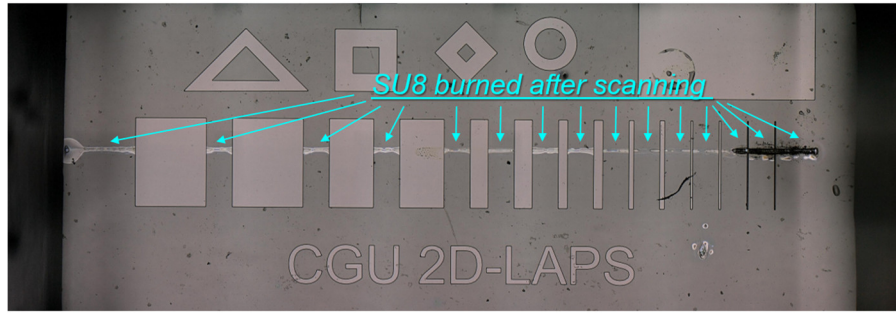

**Figure S4.** The damage area of the SU8–2005 layer was induced by an excessive heating effect of the absorption of a high-power 405 nm laser illumination with an intensity higher than 13 mW (e.g., trigger current of 0.035 A).

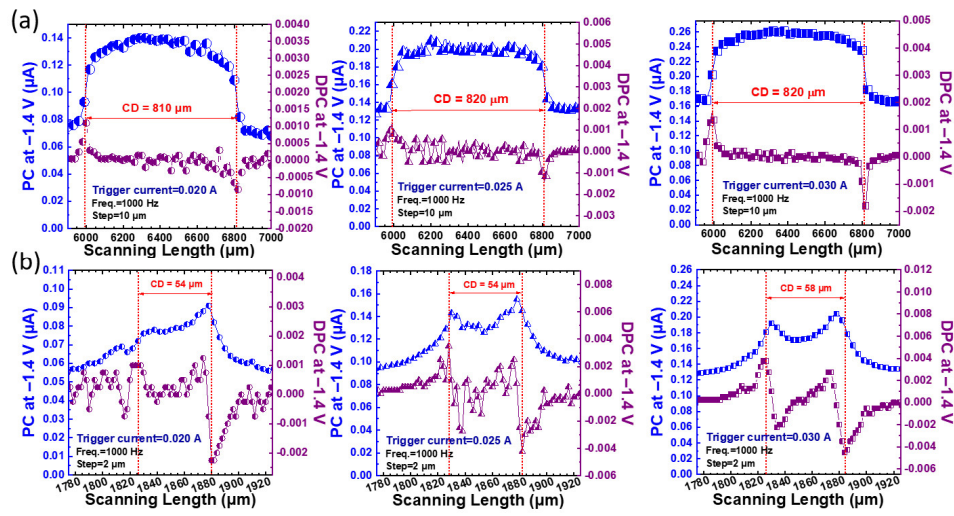

**Figure S5.** PC-SL plots of the patterns with width/spacing ratios of (a) 800/10  $\mu\text{m}$  and (b) 50/2  $\mu\text{m}$  at the same AC frequency of 1000 Hz and trigger currents of 0.020, 0.025, and 0.030 A, respectively.

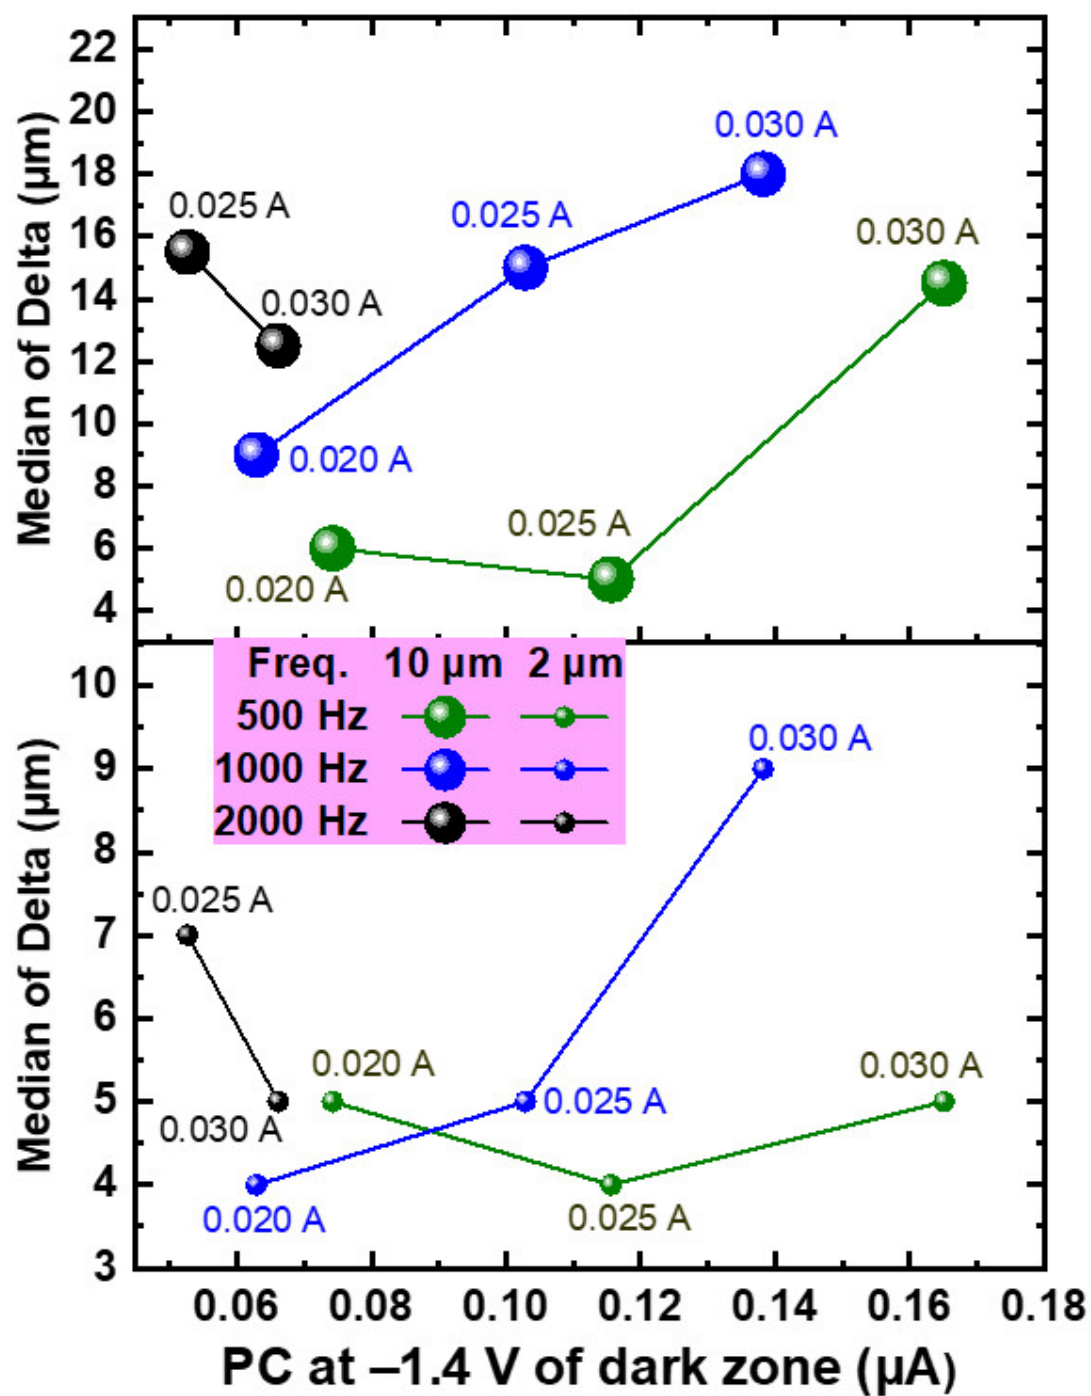

**Figure S6.** Plot of the median delta CD and photocurrent measured at -1.4 V in the dark zone for all AC frequencies with step spacings of 10 and 2  $\mu\text{m}$ .
